# Supplementary material for: Structure of DNA-functionalized dendrimer nanoparticles
Source: Royal Society of Chemistry journal article supplement (doi:10.1039/c1sm06317k), 2011-12-23
Supplement: c1sm06317k.pdf [file c1sm06317k.pdf]

**Supplementary materials for**  
**Structure of DNA-Functionalized Dendrimer Nanoparticles**  
Mattaparthi Venkata Satish Kumar and Prabal K Maiti

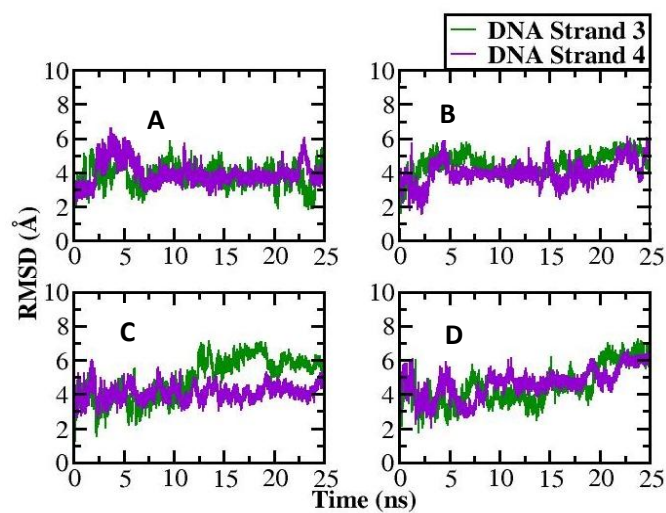

**Figure S1:** Root mean square deviation (RMSD) of ssDNAs (strand 3 & 4) of (a)  $G_3A_{10}$  (b)  $G_3C_{10}$  (c)  $G_4A_{10}$  (d)  $G_4C_{10}$ . In most of the cases the value of the RMSD becomes stable after 6 ns.

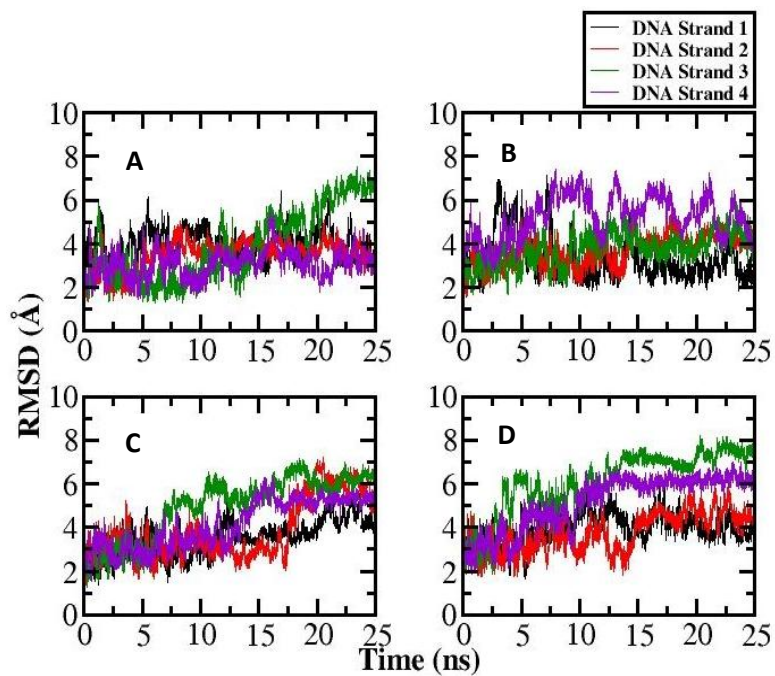

**Figure S2:** Root mean square deviation (RMSD) of ssDNAs of (A)  $G_3^4G_{10}$  (B)  $G_3^4T_{10}$  (C)  $G_4^4G_{10}$  (D)  $G_4^4T_{10}$ . In most of the cases the value of the RMSD becomes stable after 6 ns.

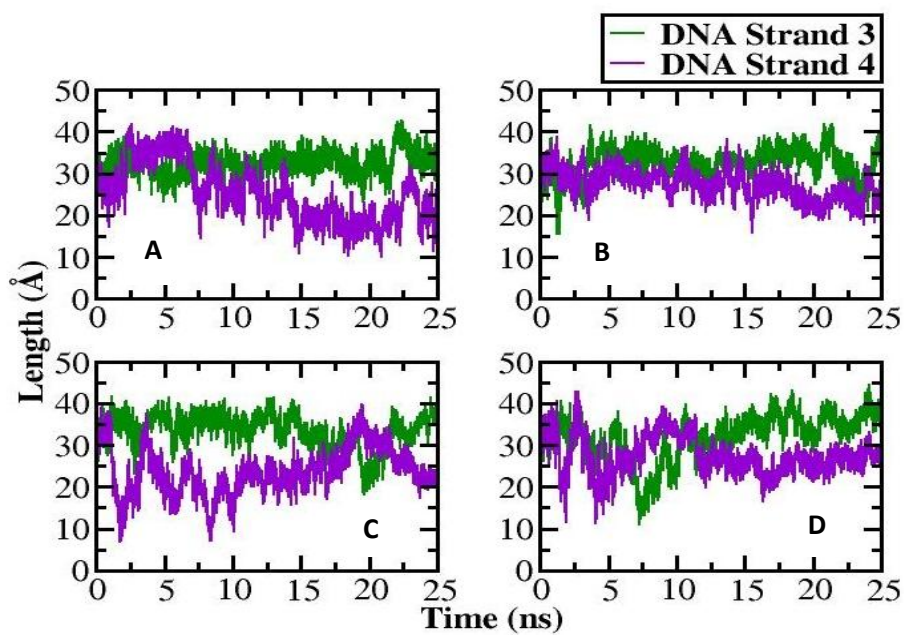

**Figure S3:** End to end distance (Length) of ssDNAs (strand 3 & 4) of (A)  $G_3A_{10}$  (B)  $G_3C_{10}$  (C)  $G_4A_{10}$  (D)  $G_4C_{10}$ .

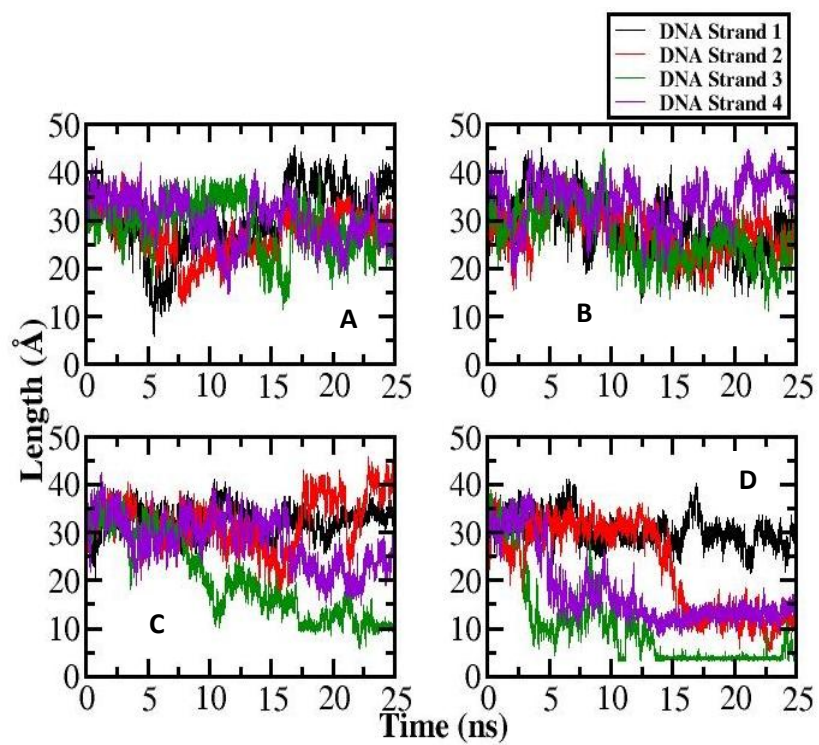

**Figure S4:** End to end distance (Length) of ssDNAs of (A)  $G_34G_{10}$  (B)  $G_34T_{10}$  (C)  $G_44G_{10}$  (D)  $G_44T_{10}$ .

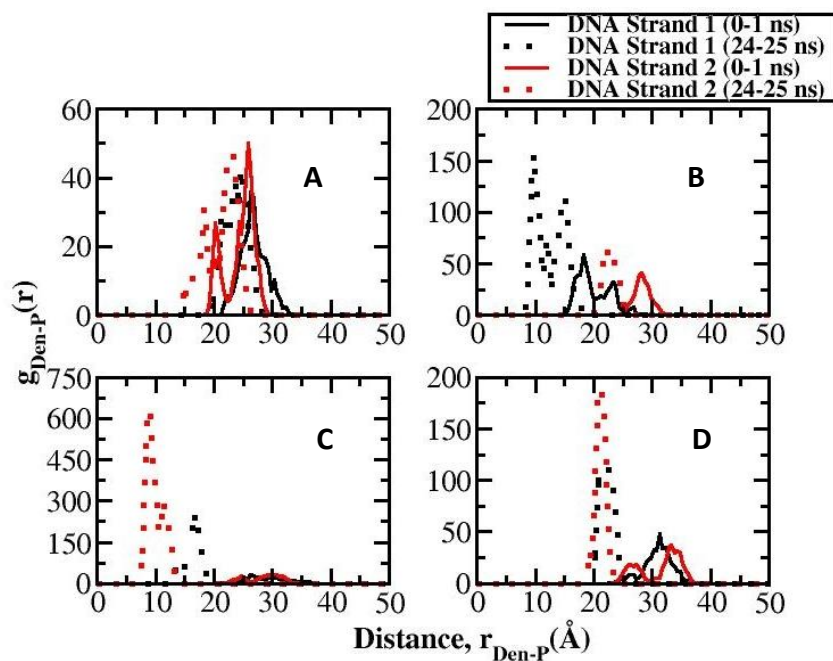

**Figure S5:** Radial distribution function of the Phosphorous atom of the first base next to the linker molecule relative to the center of the dendrimer particle for (A)  $G_34G_{10}$  (B)  $G_34T_{10}$  (C)  $G_44G_{10}$  (D)  $G_44T_{10}$  at the (0-1) ns (represented using continuous lines) and at (24-25) ns (represented using dashed lines) of the simulation. Radial distribution function of each of ssDNA is shown separately in different colours.

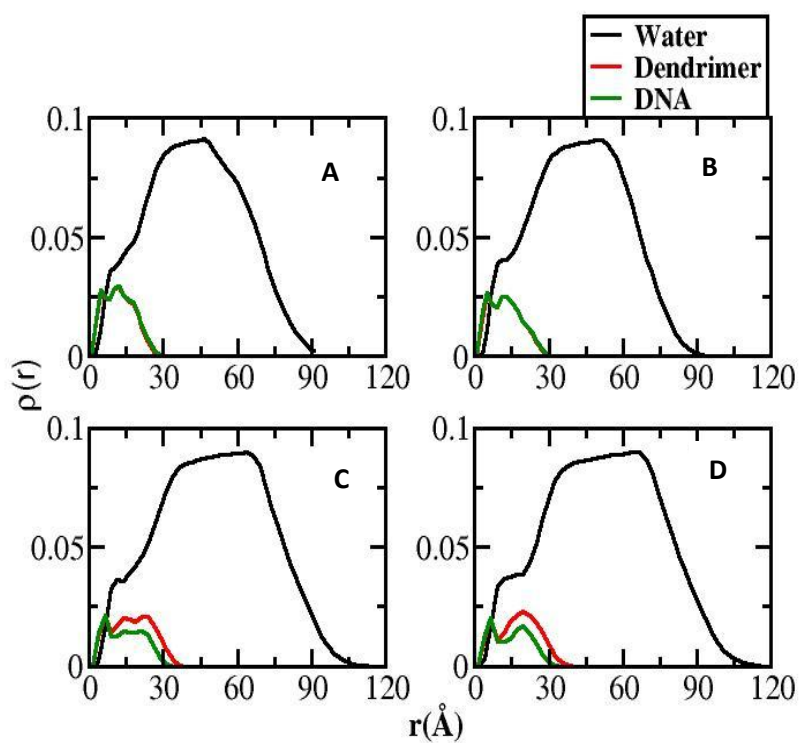

**Figure S6:** Density distribution for DNA, the dendrimer, and water in (A)  $G_34G_{10}$  (B)  $G_34T_{10}$  (C)  $G_44G_{10}$  (D)  $G_44T_{10}$ . The numbers shown were averaged from snapshots every 0.5 ps for the last 2 ns of the 25 ns long trajectory. The distribution has been calculated with respect to the center of mass of the dendrimer.
